# Supplementary material for: Protocol of a scoping review on knowledge translation competencies
Source: PubMed Central journal article supplement (PMC5414292; doi:10.1186/s13643-017-0481-z), 2017-05-02
Supplement: 13643_2017_481_MOESM3_ESM.pdf [file 13643_2017_481_MOESM3_ESM.pdf]

**Appendix 3 – Data Extraction Form**

|                                         |                                                                           |    |
|-----------------------------------------|---------------------------------------------------------------------------|----|
| Reviewer:                               |                                                                           |    |
| Date:                                   |                                                                           |    |
| <b>Publication Information</b>          |                                                                           |    |
| Study unique ID:                        |                                                                           |    |
| 1 <sup>st</sup> Author's Name:          |                                                                           |    |
| Publication Year:                       |                                                                           |    |
| Journal:                                |                                                                           |    |
| Country:                                |                                                                           |    |
| <b>Demographics</b>                     |                                                                           |    |
| Population/Sample:                      |                                                                           |    |
| Study Design:                           |                                                                           |    |
| <b>Theoretical Framework</b>            |                                                                           |    |
| Yes (specify):                          |                                                                           | No |
| <b>KT competencies</b>                  |                                                                           |    |
| Knowledge (specify):                    | <ul style="list-style-type: none"> <li>•</li> <li>•</li> <li>•</li> </ul> |    |
| Skills (specify):                       | <ul style="list-style-type: none"> <li>•</li> <li>•</li> <li>•</li> </ul> |    |
| Attitudes (specify):                    | <ul style="list-style-type: none"> <li>•</li> <li>•</li> <li>•</li> </ul> |    |
| <b>Data analysis</b>                    |                                                                           |    |
| Quantitative:                           |                                                                           |    |
| Qualitative:                            |                                                                           |    |
| Not applicable:                         |                                                                           |    |
| <b>Study Results</b>                    |                                                                           |    |
| Main findings:                          | <ul style="list-style-type: none"> <li>•</li> <li>•</li> <li>•</li> </ul> |    |
| <b>Interventions/Strategies</b>         |                                                                           |    |
| Yes (specify):                          |                                                                           | No |
| What was the focus of the intervention? |                                                                           |    |
| Description of the intervention:        |                                                                           |    |
| <b>Conclusion</b>                       |                                                                           |    |
| Include:                                |                                                                           |    |
| Exclude (provide rationale):            |                                                                           |    |
| Additional Comments:                    |                                                                           |    |
